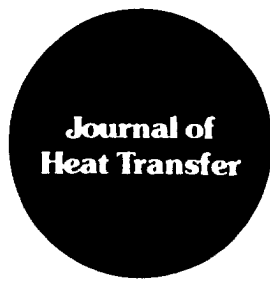

# Editorial

*From the Editor:*

The *Journal of Heat Transfer* has traditionally published two types of technical submissions: standard papers generally of about six journal pages in length, and Technical Notes, which are on the order of one-and-one-half pages. Journal policy is to obtain a minimum of three external reviews for papers, and at least two reviews (one of which may be by an Associate Editor) for papers submitted by the author as a Technical Note.

The JHT Board of Editors has recommended a procedure to provide an outlet for more timely publication of some submissions to the Journal without compromising the Journal's noted review process. **For work submitted in the form of a Technical Note and designated by the author as a *Rapid Communication*, the Editor will strive to obtain one review by an Associate Editor and one additional review. If the reviews recommend publication, then publication will be guaranteed within six months of submittal, with possible publication on**

**the JHT web page upon acceptance (we are working with ASME on a policy for this). *Rapid Communications* will be strictly limited to one-and-one-half Journal pages.**

Meeting the guarantee for this process will require rapid response by all concerned: assignment by the Editor to the Associate Editors, timely response by reviewers, rapid response by authors to incorporate reviewers' comments and in reading, correcting, and returning page proofs.

Authors wishing to submit a *Rapid Communication* should follow the Instructions for Authors for submissions in the form of a Technical Note, but clearly state in the cover letter that the submission is to be treated as a *Rapid Communication*. The Editorial Board will strive to make this system work as an additional method for the Journal to be of service to the heat transfer community.

**John R. Howell**  
Technical Editor
